# Supplementary material for: Mechanism and Effect of Amino Acids on Lactic Acid Production in Acidic Fermentation of Food Waste
Source: MDPI journal article supplement (doi:10.3390/fermentation10040179), 2024-03-25
Supplement: s1 [file s1]

Archive with 1 entries (1 files):
- fermentation-2921636-supplementary.pdf
